# Supplementary material for: Effects of home healthcare for adults with chronic respiratory diseases and post-COVID-19 syndrome on hospital bed turnover rate: a protocol of systematic review with meta-analysis
Source: PubMed Central journal article supplement — BMJ Open. 2023 Apr 3;13(4):e069341. doi: 10.1136/bmjopen-2022-069341 (PMC10083526; doi:10.1136/bmjopen-2022-069341), 2023-04-03
Supplement: bmjopen-2022-069341supp001.pdf [file bmjopen-2022-069341supp001.pdf]

## SEARCH STRATEGY

### CENTRAL

- #1 (hospital:ti,ab,kw NEAR/3 home:ti,ab,kw)
- #2 [mh ^"home care services"] OR [mh ^"home care services, hospital-based"] OR [mh ^"home health nursing"] OR [mh ^"home infusion therapy"] OR [mh ^"home nursing"] OR [mh ^"homemaker services"] OR [mh ^"parenteral nutrition, home"]
- #3 ((home\* NEXT "versus" NEXT hospital\*):ti,ab,kw OR ("home care versus" NEXT hospital\*):ti,ab,kw OR (home\* NEXT "vs" NEXT hospital\*):ti,ab,kw OR ("home care vs" NEXT hospital\*):ti,ab,kw OR (hospital\* NEXT "versus" NEXT home\*):ti,ab,kw OR (hospital\* NEXT "vs" NEXT home\*):ti,ab,kw OR (home\* NEXT "or" NEXT hospital\*):ti,ab,kw OR ("home care or" NEXT hospital\*):ti,ab,kw OR (hospital\* NEXT "or" NEXT home\*):ti,ab,kw)
- #4 "Home hospitali"((hospital\*:ti,ab,kw OR "conventional care":ti,ab,kw OR "conventional management":ti,ab,kw OR ("conventional" NEXT therap\*):ti,ab,kw OR ("conventional" NEXT treatment\*):ti,ab,kw OR "usual care":ti,ab,kw) NEAR/2 alternative\*:ti,ab,kw)
- #5 (admission\*:ti,ab,kw NEAR/2 avoid\*:ti,ab,kw)
- #6 ((Home-based:ti,ab,kw OR "at home":ti,ab,kw OR "home care":ti,ab,kw OR homecare:ti,ab,kw OR ("home" NEXT treatment\*):ti,ab,kw OR ("home" NEXT therap\*):ti,ab,kw OR ((early:ti,ab,kw OR earlier:ti,ab,kw OR home\*:ti,ab,kw) NEAR/2 discharge\*:ti,ab,kw) OR ((outpatient:ti,ab,kw OR "out patient":ti,ab,kw) NEXT (setting\*:ti,ab,kw OR care:ti,ab,kw))) NEAR/15 (hospital-based:ti,ab,kw OR "hospital care":ti,ab,kw OR "in hospital":ti,ab,kw OR ((inpatient:ti,ab,kw OR "in patient":ti,ab,kw) NEXT (care:ti,ab,kw OR setting\*:ti,ab,kw)) OR ("general" NEXT ward?1):ti,ab,kw OR hospitaliz\*:ti,ab,kw OR hospitalis\*:ti,ab,kw OR "usual care":ti,ab,kw OR "conventional care":ti,ab,kw OR "conventional management":ti,ab,kw OR ("conventional" NEXT hospital\*):ti,ab,kw OR ("conventional" NEXT therap\*):ti,ab,kw OR ("conventional" NEXT treatment\*):ti,ab,kw))
- #7 #1 OR #2 OR #3 OR #4 OR #5 OR #6
- #8 [mh "lung diseases"]
- #9 (chronic:ti,ab,kw NEXT (lung:ti,ab,kw OR pulmonary:ti,ab,kw OR respirat\*:ti,ab,kw) NEXT (condition\*:ti,ab,kw OR disease\*:ti,ab,kw OR disorder\*:ti,ab,kw OR illness\*:ti,ab,kw))
- #9 [mh "Pulmonary Disease, Chronic Obstructive"]
- #10 (pulmonary:ti,ab,kw NEAR/2 disease\*:ti,ab,kw)
- #11 [mh asthma]
- #12 asthma\*:ti,ab,kw
- #13 "Post-acute COVID-19 syndrome":ti,ab,kw
- #14 ((([mh SARS-CoV-2] OR [mh COVID-19]) AND sequela\*:ti,ab) OR ("long Covid":ti,ab,kw OR ((Covid:ti,ab,kw OR Covid19:ti,ab,kw OR "corona virus 2019":ti,ab,kw OR "coronavirus 2019":ti,ab,kw OR SARS-CoV-2:ti,ab,kw OR B.1.1.7:ti,ab,kw OR B.1.351:ti,ab,kw OR B.1.1.28:ti,ab,kw OR B.1.617:ti,ab,kw OR BA.1:ti,ab,kw OR BA.2:ti,ab,kw OR BA.3:ti,ab,kw OR BA.4:ti,ab,kw OR BA.5:ti,ab,kw OR omicron:ti,ab,kw OR deltacron:ti,ab,kw OR "delta variant":ti,ab,kw OR "delta subvariant":ti,ab,kw) NEAR/3 (PASC:ti,ab,kw OR sequela\*:ti,ab,kw OR "post acute":ti,ab,kw OR postacute:ti,ab,kw OR prolonged:ti,ab,kw OR ("long" NEXT haul\*):ti,ab,kw OR chronic:ti,ab,kw OR

lingering:ti,ab,kw OR ongoing:ti,ab,kw OR persistent:ti,ab,kw OR "long term":ti,ab,kw OR "more than 12 weeks":ti,ab,kw OR "more than 24 weeks":ti,ab,kw)))  
 #15 "cystic fibrosis":ti,ab,kw  
 #16 (("pulmonary" NEXT fibros\*):ti,ab,kw OR ("fibrosing" NEXT alveolit\*):ti,ab,kw)  
 #17 [mh Bronchiectasis]  
 #18 Bronchiectas\*:ti,ab,kw  
 #19 [mh ^"Pulmonary Heart Disease"]  
 #20 #9 OR #10 OR #11 OR #12 OR #13 OR #14 OR #15 OR #16 OR #17 OR #18 OR #19 OR #20 OR #21  
 #21 #7 AND #20

## EMBASE

Embase Classic <1947 to 1973>

1 (hospital adj3 home).mp.  
 2 "home care services"/ or "home care services, hospital-based"/ or "home health nursing"/ or "home infusion therapy"/ or "home nursing"/ or "homemaker services"/ or "parenteral nutrition, home"/  
 3 ("home\* versus hospital\*" or "home care versus hospital\*" or "home\* vs hospital\*" or "home care vs hospital\*" or "hospital\* versus home\*" or "hospital\* vs home\*" or "home\* or hospital\*" or "home care or hospital\*" or "hospital\* or home\*").tw,kf.  
 4 ((hospital\* or "conventional care" or "conventional management" or "conventional therap\*" or "conventional treatment\*" or "usual care") adj2 alternative\*).tw,kf.  
 5 (admission\* adj2 avoid\*).tw,kf.  
 6 ((Home-based or "at home" or "home care" or homecare or "home treatment\*" or "home therap\*" or ((early or earlier or home\*) adj2 discharge\*) or ((outpatient or "out patient") adj (setting\* or care))) adj15 (hospital-based or "hospital care" or "in hospital" or ((inpatient or "in patient") adj (care or setting\*)) or "general ward\$1" or hospitaliz\* or hospitalis\* or "usual care" or "conventional care" or "conventional management" or "conventional hospital\*" or "conventional therap\*" or "conventional treatment\*").tw,kf.  
 7 "Home hospitali".mp. [mp=title, abstract, heading word, drug trade name, original title, device manufacturer, drug manufacturer, device trade name, keyword heading word, floating subheading word, candidate term word]  
 8 1 or 2 or 3 or 4 or 5 or 6 or 7  
 9 exp "lung disease"/  
 10 (chronic adj (lung or pulmonary or respirat\*) adj (condition\* or disease\* or disorder\* or illness\*)).mp.  
 11 exp "chronic obstructive lung disease"/  
 12 (pulmonary adj2 disease\*).mp.  
 13 exp asthma/  
 14 asthma\*.mp.  
 15 "Post-acute COVID-19 syndrome".mp.  
 16 "cystic fibrosis".mp.  
 17 ("pulmonary fibros\*" or "fibrosing alveolit\*").mp.  
 18 exp Bronchiectasis/  
 19 Bronchiectas\*.mp.

- 20 "Pulmonary Heart Disease"/  
 21 9 or 10 or 11 or 12 or 13 or 14 or 15 or 16 or 17 or 18 or 19 or 20  
 22 ("randomized controlled trial" or "controlled clinical trial").pt. or randomized.ab. or  
 randomised.ab. or placebo.ab. or "Drug Therapy".fs. or randomly.ab. or trial.ab. or groups.ab.  
 23 exp "cohort analysis"/ or exp "epidemiology"/ or exp "clinical trial"/ or exp "evaluation  
 study"/ or exp "statistics"/ or ((control and (group\* or study)) or (time and factors) or  
 program\$3 or survey\* or ci or cohort or "comparative stud\*" or "evaluation studies" or follow-  
 up\*).mp.  
 24 22 or 23  
 25 8 and 21 and 24  
 26 (animals/ not humans/) or comment/ or editorial/ or consensus/ or exp guideline/ or  
 "History".fs. or "case report".mp.  
 27 25 not 26

## MEDLINE

Ovid MEDLINE(R) ALL <1946 to July 29, 2022>

- 1 (hospital adj3 home).mp.  
 2 home care services/ or home care services, hospital-based/ or home health nursing/ or  
 home infusion therapy/ or home nursing/ or homemaker services/ or parenteral nutrition, home/  
 3 (home\* versus hospital\* or home care versus hospital\* or home\* vs hospital\* or home  
 care vs hospital\* or hospital\* versus home\* or hospital\* vs home\* or "home\* or hospital\*" or  
 "home care or hospital\*" or "hospital\* or home\*").tw,kf.  
 4 Home hospitali#ation\*.tw,kf.  
 5 ((hospital\* or conventional care or conventional management or conventional therap\*  
 or conventional treatment\* or usual care) adj2 alternative\*).tw,kf.  
 6 (admission\* adj2 avoid\*).tw,kf.  
 7 ((Home-based or "at home" or home care or homecare or home treatment\* or home  
 therap\* or ((early or earlier or home\*) adj2 discharge\*) or ((outpatient or out patient) adj  
 (setting\* or care))) adj15 (hospital-based or hospital care or in hospital or ((inpatient or in  
 patient) adj (care or setting\*)) or general ward\$1 or hospitaliz\* or hospitalis\* or usual care or  
 conventional care or conventional management or conventional hospital\* or conventional  
 therap\* or conventional treatment\*).tw,kf.  
 8 or/1-7  
 9 exp lung diseases/  
 10 (chronic adj (lung or pulmonary or respirat\*) adj (condition\* or disease\* or disorder\*  
 or illness\*)).mp.  
 11 exp Pulmonary Disease, Chronic Obstructive/  
 12 (pulmonary adj2 disease\*).mp.  
 13 exp asthma/  
 14 asthma\*.mp.  
 15 Post-acute COVID-19 syndrome.mp.  
 16 ((exp SARS-CoV-2/ or exp COVID-19/) and sequela\*.ti,ab.) or ("long Covid" or  
 ((Covid or Covid19 or "corona virus 2019" or "coronavirus 2019" or SARS-CoV-2 or "B.1.1.7"  
 or "B.1.351" or "B.1.1.28" or "B.1.617" or "BA.1" or "BA.2" or "BA.3" or "BA.4" or "BA.5"

or omicron or deltacron or "delta variant" or "delta subvariant") adj3 (PASC or sequela\* or "post acute" or postacute or prolonged or "long haul\*" or chronic or lingering or ongoing or persistent or "long term" or "more than 12 weeks" or "more than 24 weeks"))).mp.

17 cystic fibrosis.mp.

18 (pulmonary fibros\* or fibrosing alveolit\*).mp.

19 exp Bronchiectasis/

20 Bronchiectas\*.mp.

21 Pulmonary Heart Disease/

22 or/9-21

23 (randomized controlled trial or controlled clinical trial).pt. or randomized.ab. or randomised.ab. or placebo.ab. or drug therapy.fs. or randomly.ab. or trial.ab. or groups.ab.

24 exp cohort studies/ or exp epidemiologic studies/ or exp clinical trial/ or exp evaluation studies as topic/ or exp statistics as topic/ or ((control and (group\* or study)) or (time and factors) or program\$3 or survey\* or ci or cohort or comparative stud\* or evaluation studies or follow-up\*).mp.

25 23 or 24

26 8 and 22 and 25

27 (animals/ not humans/) or comment/ or editorial/ or consensus/ or exp guideline/ or hi.fs. or case report.mp.

28 26 not 27

## CINAHL

#1 (hospital N3 home)

#2 (MH "Home Health Care") OR (MH "Home Visits") OR (MH "Psychiatric Home Care") OR (MH "Home Nutritional Support") OR (MH "Home Nursing, Professional") OR (MH "Home Intravenous Therapy") OR (MH "Home Rehabilitation+") OR (MH "Home Nursing") OR (MH "Homemaker Services") OR (MH "Hospital to Home Transition")

#3 ((TI "home\* versus hospital\*" OR AB "home\* versus hospital\*" OR SU "home\* versus hospital\*") OR (TI "home care versus hospital\*" OR AB "home care versus hospital\*" OR SU "home care versus hospital\*") OR (TI "home\* vs hospital\*" OR AB "home\* vs hospital\*" OR SU "home\* vs hospital\*") OR (TI "home care vs hospital\*" OR AB "home care vs hospital\*" OR SU "home care vs hospital\*") OR (TI "hospital\* versus home\*" OR AB "hospital\* versus home\*" OR SU "hospital\* versus home\*") OR (TI "hospital\* vs home\*" OR AB "hospital\* vs home\*" OR SU "hospital\* vs home\*") OR (TI "home\* or hospital\*" OR AB "home\* or hospital\*" OR SU "home\* or hospital\*") OR (TI "home care or hospital\*" OR AB "home care or hospital\*" OR SU "home care or hospital\*") OR (TI "hospital\* or home\*" OR AB "hospital\* or home\*" OR SU "hospital\* or home\*"))

#4 "Home hospitali\*"

#5 (((TI hospital\* OR AB hospital\* OR SU hospital\*) OR (TI "conventional care" OR AB "conventional care" OR SU "conventional care")) OR (TI "conventional management" OR AB "conventional management" OR SU "conventional management")) OR (TI "conventional therap\*" OR AB "conventional therap\*" OR SU "conventional therap\*") OR (TI "conventional treatment\*" OR AB "conventional treatment\*" OR SU "conventional treatment\*") OR (TI "usual care" OR AB "usual care" OR SU "usual care")) N2 (TI alternative\* OR AB alternative\* OR SU alternative\*)

- #6 ((TI admission\* OR AB admission\* OR SU admission\*) N2 (TI avoid\* OR AB avoid\* OR SU avoid\*))
- #7 (((TI Home-based OR AB Home-based OR SU Home-based) OR (TI "at home" OR AB "at home" OR SU "at home")) OR (TI "home care" OR AB "home care" OR SU "home care")) OR (TI homecare OR AB homecare OR SU homecare) OR (TI "home treatment\*" OR AB "home treatment\*" OR SU "home treatment\*") OR (TI "home therap\*" OR AB "home therap\*" OR SU "home therap\*") OR (((TI early OR AB early OR SU early) OR (TI earlier OR AB earlier OR SU earlier) OR (TI home\* OR AB home\* OR SU home\*)) N2 (TI discharge\* OR AB discharge\* OR SU discharge\*)) OR (((TI outpatient OR AB outpatient OR SU outpatient) OR (TI "out patient" OR AB "out patient" OR SU "out patient")) W1 ((TI setting\* OR AB setting\* OR SU setting\*) OR (TI care OR AB care OR SU care)))) N15 ((TI hospital-based OR AB hospital-based OR SU hospital-based) OR (TI "hospital care" OR AB "hospital care" OR SU "hospital care")) OR (TI "in hospital" OR AB "in hospital" OR SU "in hospital") OR (((TI inpatient OR AB inpatient OR SU inpatient) OR (TI "in patient" OR AB "in patient" OR SU "in patient")) W1 ((TI care OR AB care OR SU care) OR (TI setting\* OR AB setting\* OR SU setting\*))) OR (TI "general ward?" OR AB "general ward?" OR SU "general ward?") OR (TI hospitaliz\* OR AB hospitaliz\* OR SU hospitaliz\*) OR (TI hospitalis\* OR AB hospitalis\* OR SU hospitalis\*) OR (TI "usual care" OR AB "usual care" OR SU "usual care") OR (TI "conventional care" OR AB "conventional care" OR SU "conventional care") OR (TI "conventional management" OR AB "conventional management" OR SU "conventional management") OR (TI "conventional hospital\*" OR AB "conventional hospital\*" OR SU "conventional hospital\*") OR (TI "conventional therap\*" OR AB "conventional therap\*" OR SU "conventional therap\*") OR (TI "conventional treatment\*" OR AB "conventional treatment\*" OR SU "conventional treatment\*"))
- #8 S1 OR S2 OR S3 OR S4 OR S5 OR S6 OR S7
- #9 (MH "Lung Diseases+")
- #10 (chronic W1 (lung OR pulmonary OR respirat\*) W1 (condition\* OR disease\* OR disorder\* OR illness\*))
- #11 (pulmonary N2 disease\*)
- #12 (MH asthma+)
- #13 asthma\*
- #14 (MH "Post-Acute COVID-19 Syndrome") OR ((MH "SARS-CoV-2") OR (MH "COVID-19+") AND (TI sequela\* OR AB sequela\*)) OR ("long Covid" OR ((Covid OR Covid19 OR "corona virus 2019" OR "coronavirus 2019" OR SARS-CoV-2 OR B.1.1.7 OR B.1.351 OR B.1.1.28 OR B.1.617 OR BA.1 OR BA.2 OR BA.3 OR BA.4 OR BA.5 OR omicron OR deltacron OR "delta variant" OR "delta subvariant")) N3 (PASC OR sequela\* OR "post acute" OR postacute OR prolonged OR "long haul\*" OR chronic OR lingering OR ongoing OR persistent OR "long term" OR "more than 12 weeks" OR "more than 24 weeks"))
- #15 (MH "critical care+")
- #16 TI("cystic fibrosis") OR AB("cystic fibrosis") OR SU("cystic fibrosis")
- #17 (MH "critical illness")
- #18 TI("pulmonary fibros\*" OR "fibrosing alveolit\*") OR AB("pulmonary fibros\*" OR "fibrosing alveolit\*") OR SU("pulmonary fibros\*" OR "fibrosing alveolit\*")
- #19 (MH Bronchiectasis)
- #20 Bronchiectas\*
- #21 (MH "Pulmonary Heart Disease")
- #22 S9 OR S10 OR S11 OR S12 OR S13 OR S14 OR S15 OR S16 OR S17 OR S18 OR S19 OR S20 OR S21
- #23 (randomized controlled trials OR MH double-blind studies OR MH single-blind studies OR MH random assignment OR MH pretest-posttest design OR MH cluster sample OR TI

(randomised OR randomized) OR AB (random\*) OR TI (trial) OR (MH (sample size) AND AB (assigned OR allocated OR control)) OR MH (placebos) OR PT (randomized controlled trial) OR AB (control W5 group) OR MH (crossover design) OR MH (comparative studies) OR AB (cluster W3 RCT))

#24 (MH "prospective studies"+) OR (MH "epidemiological research") OR (MH "clinical research"+) OR (MH "evaluation research"+) OR (MH "statistics"+) OR ((control AND (group\* OR study)) OR (time AND factors) OR program\* OR survey\* OR ci OR cohort OR "comparative stud\*" OR "evaluation studies" OR follow-up\*)

#25 S23 OR S24

#26 S8 AND S22 AND S25

#27 ((MH animals+ OR MH animal studies OR TI animal model\*) NOT MH human) OR (PT commentary) OR (PT editorial) OR (MH practice guidelines) OR (MW HI) OR PT(case report)

#28 S26 NOT S27
